# Supplementary material for: Development and content validity of the Abilitator: a self-report questionnaire on work ability and functioning aimed at the population in a weak labour market position
Source: BMC Public Health. 2020 Mar 14;20:327. doi: 10.1186/s12889-020-8391-8 (PMC7071596; doi:10.1186/s12889-020-8391-8)
Supplement: Supplementary file 3 — Additional file 3. The interpretation of the Abilitator’s results as it is given in a respondent’s written feedback. [file 12889_2020_8391_MOESM3_ESM.pdf]

Additional file 3. The interpretation of the Abilitator's results as it is given in a respondent's written feedback.

| Work Ability & Functioning                    |                                           | Inclusion                         |                              |                       | Mind                  |                              |                     | Everyday life          |                              |                       | Skills                               |                              |                     | Body                                                        |                              |                     | Other                                                                                                                                                                         |
|-----------------------------------------------|-------------------------------------------|-----------------------------------|------------------------------|-----------------------|-----------------------|------------------------------|---------------------|------------------------|------------------------------|-----------------------|--------------------------------------|------------------------------|---------------------|-------------------------------------------------------------|------------------------------|---------------------|-------------------------------------------------------------------------------------------------------------------------------------------------------------------------------|
| Points (sum of options from either B3 and B4) | Description (only written feedback given) | Points (sum of C1-C8 and C14-C17) | Given percent value (0-100%) | Description           | Points (sum of D1-D9) | Given percent value (0-100%) | Description         | Points (sum of E1-E11) | Given percent value (0-100%) | Description           | Points (sum of F1-F3, E4 and F5-F10) | Given percent value (0-100%) | Description         | Points (sum of options from G1, G5 and G7 or G1, G4 and G6) | Given percent value (0-100%) | Description         | The questions not taken into account in the Abilitator's respondent's feedback, but are analysed separately according to the instructions given in the Abilitator user manual |
| 0-5                                           | Poor situation                            | 12                                | 0                            | Poor situation        | 9                     | 0                            | Poor situation      | 11                     | 0                            | Poor situation        | 10                                   | 0                            | Poor situation      | 3                                                           | 0                            | Poor situation      | Personal information: entirely                                                                                                                                                |
| 6-7                                           | Fairly poor situation                     | 13                                | 2                            |                       | 10                    | 3                            |                     | 12                     | 2                            |                       | 11                                   | 3                            |                     | 4                                                           | 10                           |                     | Well-being: B1,B2, B5                                                                                                                                                         |
| 8-9                                           | Good situation                            | 14                                | 4                            |                       | 11                    | 6                            |                     | 13                     | 5                            |                       | 12                                   | 5                            |                     | 5                                                           | 20                           |                     | Inclusion: C9-C13                                                                                                                                                             |
| 10                                            | Excellent situation                       | 15                                | 6                            |                       | 12                    | 8                            |                     | 14                     | 7                            |                       | 13                                   | 8                            |                     | 6                                                           | 30                           |                     | Skills: F4                                                                                                                                                                    |
|                                               |                                           | 16                                | 8                            |                       | 13                    | 11                           |                     | 15                     | 9                            |                       | 14                                   | 10                           |                     | 7                                                           | 40                           | Possible challenges | Body: G2, G9-G12                                                                                                                                                              |
|                                               |                                           | 17                                | 10                           |                       | 14                    | 14                           |                     | 16                     | 11                           |                       | 15                                   | 13                           |                     | 8                                                           | 50                           |                     | Background information: entirely                                                                                                                                              |
|                                               |                                           | 18                                | 13                           |                       | 15                    | 17                           |                     | 17                     | 14                           |                       | 16                                   | 15                           |                     | 9                                                           | 60                           |                     | Work & the Future: entirely                                                                                                                                                   |
|                                               |                                           | 19                                | 15                           |                       | 16                    | 19                           |                     | 18                     | 16                           |                       | 17                                   | 18                           |                     | 10                                                          | 70                           |                     |                                                                                                                                                                               |
|                                               |                                           | 20                                | 17                           |                       | 17                    | 22                           |                     | 19                     | 18                           |                       | 18                                   | 20                           |                     | 11                                                          | 80                           |                     |                                                                                                                                                                               |
|                                               |                                           | 21                                | 19                           |                       | 18                    | 25                           | Possible challenges | 20                     | 20                           |                       | 19                                   | 23                           |                     | 12                                                          | 90                           | Good situation      |                                                                                                                                                                               |
|                                               |                                           | 22                                | 21                           |                       | 19                    | 28                           |                     | 21                     | 23                           |                       | 20                                   | 25                           |                     | 13                                                          | 100                          |                     |                                                                                                                                                                               |
|                                               |                                           | 23                                | 23                           |                       | 20                    | 31                           |                     | 22                     | 25                           | Fairly poor situation | 21                                   | 28                           |                     |                                                             |                              |                     |                                                                                                                                                                               |
|                                               |                                           | 24                                | 25                           | Fairly poor situation | 21                    | 33                           |                     | 23                     | 27                           |                       | 22                                   | 30                           |                     |                                                             |                              |                     |                                                                                                                                                                               |
|                                               |                                           | 25                                | 27                           |                       | 22                    | 36                           |                     | 24                     | 30                           |                       | 23                                   | 33                           |                     |                                                             |                              |                     |                                                                                                                                                                               |
|                                               |                                           | 26                                | 29                           |                       | 23                    | 39                           |                     | 25                     | 32                           |                       | 24                                   | 35                           |                     |                                                             |                              |                     |                                                                                                                                                                               |
|                                               |                                           | 27                                | 31                           |                       | 24                    | 42                           |                     | 26                     | 34                           |                       | 25                                   | 38                           |                     |                                                             |                              |                     |                                                                                                                                                                               |
|                                               |                                           | 28                                | 33                           |                       | 25                    | 44                           |                     | 27                     | 36                           |                       | 26                                   | 40                           |                     |                                                             |                              |                     |                                                                                                                                                                               |
|                                               |                                           | 29                                | 35                           |                       | 26                    | 47                           |                     | 28                     | 39                           |                       | 27                                   | 43                           |                     |                                                             |                              |                     |                                                                                                                                                                               |
|                                               |                                           | 30                                | 38                           |                       | 27                    | 50                           |                     | 29                     | 41                           |                       | 28                                   | 45                           |                     |                                                             |                              |                     |                                                                                                                                                                               |
|                                               |                                           | 31                                | 40                           |                       | 28                    | 53                           |                     | 30                     | 43                           |                       | 29                                   | 48                           |                     |                                                             |                              |                     |                                                                                                                                                                               |
|                                               |                                           | 32                                | 42                           |                       | 29                    | 56                           |                     | 31                     | 45                           |                       | 30                                   | 50                           | Possible challenges |                                                             |                              |                     |                                                                                                                                                                               |
|                                               |                                           | 33                                | 44                           |                       | 30                    | 58                           | Good situation      | 32                     | 48                           |                       | 31                                   | 53                           |                     |                                                             |                              |                     |                                                                                                                                                                               |
|                                               |                                           | 34                                | 46                           |                       | 31                    | 61                           |                     | 33                     | 50                           | Fairly good situation | 32                                   | 55                           |                     |                                                             |                              |                     |                                                                                                                                                                               |
|                                               |                                           | 35                                | 48                           |                       | 32                    | 64                           |                     | 34                     | 52                           |                       | 33                                   | 58                           |                     |                                                             |                              |                     |                                                                                                                                                                               |
|                                               |                                           | 36                                | 50                           | Fairly good situation | 33                    | 67                           |                     | 35                     | 55                           |                       | 34                                   | 60                           |                     |                                                             |                              |                     |                                                                                                                                                                               |
|                                               |                                           | 37                                | 52                           |                       | 34                    | 69                           |                     | 36                     | 57                           |                       | 35                                   | 63                           |                     |                                                             |                              |                     |                                                                                                                                                                               |
|                                               |                                           | 38                                | 54                           |                       | 35                    | 72                           |                     | 37                     | 59                           |                       | 36                                   | 65                           |                     |                                                             |                              |                     |                                                                                                                                                                               |
|                                               |                                           | 39                                | 56                           |                       | 36                    | 75                           |                     | 38                     | 61                           |                       | 37                                   | 68                           |                     |                                                             |                              |                     |                                                                                                                                                                               |
|                                               |                                           | 40                                | 58                           |                       | 37                    | 78                           |                     | 39                     | 64                           |                       | 38                                   | 70                           |                     |                                                             |                              |                     |                                                                                                                                                                               |
|                                               |                                           | 41                                | 60                           |                       | 38                    | 81                           |                     | 40                     | 66                           |                       | 39                                   | 73                           |                     |                                                             |                              |                     |                                                                                                                                                                               |
|                                               |                                           | 42                                | 63                           |                       | 39                    | 83                           |                     | 41                     | 68                           | Good situation        | 40                                   | 75                           | Good situation      |                                                             |                              |                     |                                                                                                                                                                               |
|                                               |                                           | 43                                | 65                           |                       | 40                    | 86                           |                     | 42                     | 70                           |                       | 41                                   | 78                           |                     |                                                             |                              |                     |                                                                                                                                                                               |
|                                               |                                           | 44                                | 67                           |                       | 41                    | 89                           |                     | 43                     | 73                           |                       | 42                                   | 80                           |                     |                                                             |                              |                     |                                                                                                                                                                               |
|                                               |                                           | 45                                | 69                           |                       | 42                    | 92                           |                     | 44                     | 75                           |                       | 43                                   | 83                           |                     |                                                             |                              |                     |                                                                                                                                                                               |
|                                               |                                           | 46                                | 71                           |                       | 43                    | 94                           |                     | 45                     | 77                           |                       | 44                                   | 85                           |                     |                                                             |                              |                     |                                                                                                                                                                               |
|                                               |                                           | 47                                | 73                           |                       | 44                    | 97                           |                     | 46                     | 80                           |                       | 45                                   | 88                           |                     |                                                             |                              |                     |                                                                                                                                                                               |
|                                               |                                           | 48                                | 75                           | Good situation        | 45                    | 100                          |                     | 47                     | 82                           |                       | 46                                   | 90                           |                     |                                                             |                              |                     |                                                                                                                                                                               |
|                                               |                                           | 49                                | 77                           |                       |                       |                              |                     | 48                     | 84                           |                       | 47                                   | 93                           |                     |                                                             |                              |                     |                                                                                                                                                                               |
|                                               |                                           | 50                                | 79                           |                       |                       |                              |                     | 49                     | 86                           |                       | 48                                   | 95                           |                     |                                                             |                              |                     |                                                                                                                                                                               |
|                                               |                                           | 51                                | 81                           |                       |                       |                              |                     | 50                     | 89                           |                       | 49                                   | 98                           |                     |                                                             |                              |                     |                                                                                                                                                                               |
|                                               |                                           | 52                                | 83                           |                       |                       |                              |                     | 51                     | 91                           |                       | 50                                   | 100                          |                     |                                                             |                              |                     |                                                                                                                                                                               |
|                                               |                                           | 53                                | 85                           |                       |                       |                              |                     | 52                     | 93                           |                       |                                      |                              |                     |                                                             |                              |                     |                                                                                                                                                                               |
|                                               |                                           | 54                                | 88                           |                       |                       |                              |                     | 53                     | 95                           |                       |                                      |                              |                     |                                                             |                              |                     |                                                                                                                                                                               |
|                                               |                                           | 55                                | 90                           |                       |                       |                              |                     | 54                     | 98                           |                       |                                      |                              |                     |                                                             |                              |                     |                                                                                                                                                                               |
|                                               |                                           | 56                                | 92                           |                       |                       |                              |                     | 55                     | 100                          |                       |                                      |                              |                     |                                                             |                              |                     |                                                                                                                                                                               |
|                                               |                                           | 57                                | 94                           |                       |                       |                              |                     |                        |                              |                       |                                      |                              |                     |                                                             |                              |                     |                                                                                                                                                                               |
|                                               |                                           | 58                                | 96                           |                       |                       |                              |                     |                        |                              |                       |                                      |                              |                     |                                                             |                              |                     |                                                                                                                                                                               |
|                                               |                                           | 59                                | 98                           |                       |                       |                              |                     |                        |                              |                       |                                      |                              |                     |                                                             |                              |                     |                                                                                                                                                                               |
|                                               |                                           | 60                                | 100                          |                       |                       |                              |                     |                        |                              |                       |                                      |                              |                     |                                                             |                              |                     |                                                                                                                                                                               |
